# Supplementary material for: The Association between Blood Concentrations of PCDD/DFs, DL-PCBs and the Risk of Type 2 Diabetes Mellitus and Thyroid Cancer in South Korea
Source: Int J Environ Res Public Health. 2022 Jul 18;19(14):8745. doi: 10.3390/ijerph19148745 (PMC9320419; doi:10.3390/ijerph19148745)

# **The Association between Blood Concentrations of PCDD/DFs, DL-PCBs and the Risk of Type 2 Diabetes Mellitus and Thyroid Cancer in South Korea**

SuHyun Lee, YoungWook Lim, YounSeok Kang, KeumJi Jung and SunHa Jee

## **Supplementary Table Legends**

Supplementary Table S1. Serum concentrations for homologue of PCDD/DFs, DL-PCBs of the study group.

Supplementary Table S2. Odds Ratios of blood concentrations for homologue of PCDD/DFs, DL-PCBs (per 1 SD) and Type 2 Diabetes mellitus.

Supplementary Table S3. Odds Ratios of blood concentrations for homologue of PCDD/DFs, DL-PCBs (per 1 SD) and Thyroid Cancer.

## **Supplementary Figure Legends**

Supplementary Figure S1. Flow Chart: Sample for the Analysis, KCPS-II.

Supplementary Figure S2. Schematic diagram showing different groups of blood samples tested for blood concentrations of PCDD/DFs, DL-PCBs (pgTEQ/g\_lipid).

**Supplementary Table S1. Serum concentrations for homologue of PCDD/DFs, DL-PCBs of the study group.**

| Congener                    | Mean(SD)       |                   |                           |                          | <i>p</i> -Value |
|-----------------------------|----------------|-------------------|---------------------------|--------------------------|-----------------|
|                             | Overall        | Control<br>(n=55) | Type 2 Diabetes<br>(n=30) | Thyroid Cancer<br>(n=15) |                 |
| PCDDs (pg/g-lipid)          |                |                   |                           |                          |                 |
| 2378-TCDD                   | 0.46(1.16)     | 0.43(1.34)        | 0.27(0.59)                | 0.97(1.24)               | 0.1546          |
| 12378-PeCDD                 | 1.98(5.2)      | 0.20(1.49)        | 2.59(4.96)                | 7.25(9.43)               | <0.0001         |
| 123478-HxCDD                | 0.80(2.15)     | 0.50(1.98)        | 1.06(2.24)                | 1.38(2.53)               | 0.2792          |
| 123678-HxCDD                | 5.36(6.2)      | 4.77(6.94)        | 6.27(4.7)                 | 5.72(6.06)               | 0.5540          |
| 123789-HxCDD                | 2.1(4.54)      | 1.39(4.45)        | 3.08(4.71)                | 2.73(4.35)               | 0.2204          |
| 1234678-HpCDD               | 19.92(11.98)   | 16.86(13.74)      | 21.54(8.3)                | 27.88(5.72)              | 0.0038          |
| OCDD                        | 175.66(120.92) | 187.58(147.08)    | 135.01(58.19)             | 213.26(85.58)            | 0.0667          |
| PCDFs (pg/g-lipid)          |                |                   |                           |                          |                 |
| 2378-TCDF                   | 0.47(0.96)     | 0.24(0.8)         | 0.68(1.06)                | 0.92(1.11)               | 0.0168          |
| 12378-PeCDF                 | 1.48(2.61)     | 1.42(2.91)        | 1.3(2.18)                 | 2.03(2.31)               | 0.6638          |
| 23478-PeCDF                 | 5.15(5.36)     | 4.96(5.94)        | 5.04(4.35)                | 6.07(5.16)               | 0.7743          |
| 123478-HxCDF                | 0.91(3.61)     | 1.24(4.2)         | 0.78(3.3)                 | 0(0)                     | 0.4892          |
| 123678-HxCDF                | 1.92(5.49)     | 1.09(4.69)        | 2.3(4.89)                 | 4.21(8.37)               | 0.1337          |
| 234678-HxCDF                | 0.21(1.61)     | 0.38(2.16)        | 0(0)                      | 0(0)                     | 0.5024          |
| 123789-HxCDF                | 1.56(5.71)     | 1.79(6.34)        | 0.71(3.87)                | 2.39(6.46)               | 0.5871          |
| 1234678-HpCDF               | 7.93(5.93)     | 7.39(6.89)        | 8.52(4.15)                | 8.70(5.26)               | 0.6101          |
| 1234789-HpCDF               | 1.04(3.45)     | 0.81(3.44)        | 1.64(3.8)                 | 0.71(2.76)               | 0.5310          |
| OCDF                        | 2.69(6.36)     | 2.93(7.15)        | 1.98(5.19)                | 3.21(5.58)               | 0.7589          |
| Non-ortho PCBs (pg/g-lipid) |                |                   |                           |                          |                 |
| 4CB-77                      | 20.1(21.13)    | 14.83(18.04)      | 27.76(27.78)              | 24.14(7.26)              | 0.0176          |

|                                     |                  |                  |                  |                  |        |
|-------------------------------------|------------------|------------------|------------------|------------------|--------|
| <b>4CB-81</b>                       | 0.18(0.8)        | 0(0)             | 0.31(1.01)       | 0.55(1.47)       | 0.0346 |
| <b>5CB-126</b>                      | 27.05(13.66)     | 25.14(15.17)     | 28.99(10.36)     | 30.13(13.34)     | 0.2983 |
| <b>6CB-169</b>                      | 16.85(11.56)     | 14.92(12.81)     | 18.72(9.25)      | 20.2(10.07)      | 0.1687 |
| <b>Mono-ortho PCBs (pg/g-lipid)</b> |                  |                  |                  |                  |        |
| <b>5CB-105</b>                      | 1398.23(700.32)  | 1379.68(637.16)  | 1357.08(499.87)  | 1548.52(1164.26) | 0.6638 |
| <b>5CB-114</b>                      | 257.75(122.06)   | 276.16(136.34)   | 230.75(81.2)     | 244.26(130.04)   | 0.2362 |
| <b>5CB-118</b>                      | 6619.94(3294.99) | 6450.87(2957.3)  | 6481.58(2334.79) | 7516.62(5543.86) | 0.5245 |
| <b>5CB-123</b>                      | 104.37(50.78)    | 96.59(46.39)     | 109.93(42.46)    | 121.80(74.63)    | 0.1821 |
| <b>6CB-156</b>                      | 2039.34(1034.15) | 2121.21(1092.27) | 1909.91(833.27)  | 1998.04(1207.69) | 0.6620 |
| <b>6CB-157</b>                      | 583.97(281.45)   | 586.22(274.94)   | 558.15(239.89)   | 627.33(381.99)   | 0.7403 |
| <b>6CB-167</b>                      | 1026.99(562.15)  | 980.54(472.17)   | 1000.27(419.33)  | 1250.74(973.04)  | 0.2462 |
| <b>7CB-189</b>                      | 282.71(157.16)   | 288.68(160.78)   | 274.87(141.31)   | 276.48(182.41)   | 0.9166 |

SD, standard deviation

**Supplementary Table S2. Odds Ratios of blood concentrations for homologue of PCDD/DFs, DL-PCBs (per 1 SD) and Type 2 Diabetes mellitus.**

| Exposure      | Dataset | Model 1           | Model 2           |
|---------------|---------|-------------------|-------------------|
|               |         | OR (95% CI)       |                   |
|               |         | PCDDs             |                   |
| 2378_TCDD     | Total   | 0.84 (0.50–1.39)  | 0.82 (0.42–1.59)  |
|               | Male    | 0.85 (0.41–1.76)  | 0.32 (0.10–1.01)  |
|               | Female  | 0.81 (0.39–1.66)  | 1.32 (0.57–3.07)  |
| 12378_PeCDD   | Total   | 3.38 (1.27–9.00)  | 4.21 (1.09–16.30) |
|               | Male    | 1.64 (0.67–4.04)  | 1.25 (0.47–3.35)  |
|               | Female  | -                 | -                 |
| 123478_HxCDD  | Total   | 1.29 (0.83–2.01)  | 1.55 (0.93–2.57)  |
|               | Male    | 0.70 (0.25–1.96)  | 0.88 (0.27–2.87)  |
|               | Female  | 1.8 (0.92–3.51)   | 2.32 (0.96–5.60)  |
| 123678_HxCDD  | Total   | 1.29 (0.82–2.03)  | 1.31 (0.79–2.17)  |
|               | Male    | 1.39 (0.72–2.67)  | 1.47 (0.68–3.20)  |
|               | Female  | 1.25 (0.66–2.37)  | 1.26 (0.62–2.54)  |
| 123789_HxCDD  | Total   | 1.45 (0.90–2.34)  | 1.52 (0.90–2.57)  |
|               | Male    | 1.05 (0.59–1.90)  | 0.35 (0.11–1.14)  |
|               | Female  | 3.48 (1.04–11.63) | 3.89 (1.04–14.60) |
| 1234678_HpCDD | Total   | 1.46 (0.92–2.34)  | 1.61 (0.94–2.77)  |
|               | Male    | 1.55 (0.85–2.84)  | 2.09 (0.92–4.74)  |
|               | Female  | 1.63 (0.67–3.96)  | 1.50 (0.54–4.18)  |

|                     |        |                  |                  |
|---------------------|--------|------------------|------------------|
| <b>OCDD</b>         | Total  | 0.46 (0.21–1.01) | 0.34 (0.14–0.85) |
|                     | Male   | 0.07 (0.01–0.74) | 0.03 (0.00–0.51) |
|                     | Female | 0.91 (0.38–2.14) | 0.64 (0.24–1.66) |
| <b>PCDFs</b>        |        |                  |                  |
| <b>2378-TCDF</b>    | Total  | 1.61 (1.01–2.57) | 1.71 (1.00–2.91) |
|                     | Male   | 1.50 (0.84–2.67) | 1.70 (0.76–3.78) |
|                     | Female | 2.29 (0.95–5.51) | 2.6 (0.82–8.23)  |
| <b>12378-PeCDF</b>  | Total  | 0.95 (0.60–1.50) | 1.03 (0.61–1.72) |
|                     | Male   | 0.91 (0.45–1.85) | 0.93 (0.39–2.23) |
|                     | Female | 0.97 (0.53–1.78) | 1.05 (0.52–2.13) |
| <b>23478-PeCDF</b>  | Total  | 1.00 (0.64–1.58) | 1.38 (0.81–2.38) |
|                     | Male   | 1.08 (0.53–2.21) | 1.90 (0.68–5.35) |
|                     | Female | 1 (0.54–1.85)    | 1.12 (0.55–2.28) |
| <b>123478-HxCDF</b> | Total  | 0.89 (0.53–1.48) | 0.74 (0.42–1.30) |
|                     | Male   | -                | -                |
|                     | Female | 0.90 (0.54–1.52) | 0.71 (0.39–1.29) |
| <b>123678-HxCDF</b> | Total  | 1.34 (0.84–2.14) | 1.34 (0.82–2.19) |
|                     | Male   | -                | -                |
|                     | Female | 1.18 (0.71–1.97) | 1.09 (0.64–1.85) |
| <b>234678-HxCDF</b> | Total  | -                | -                |
|                     | Male   | -                | -                |
|                     | Female | -                | -                |
| <b>123789-HxCDF</b> | Total  | 0.79 (0.43–1.44) | 0.97 (0.51–1.82) |
|                     | Male   | 1.05 (0.57–1.92) | 1.33 (0.70–2.52) |

|                        |        |                          |                          |
|------------------------|--------|--------------------------|--------------------------|
|                        | Female | -                        | -                        |
| <b>1234678-HpCDF</b>   | Total  | 1.21 (0.77–1.90)         | 1.33 (0.78–2.27)         |
|                        | Male   | 0.67 (0.34–1.34)         | 0.48 (0.18–1.28)         |
|                        | Female | <i>4.20 (1.51–11.66)</i> | <i>6.56 (1.59–27.01)</i> |
| <b>1234789-HpCDF</b>   | Total  | 1.34 (0.83–2.14)         | <i>1.93 (1.11–3.34)</i>  |
|                        | Male   | 2.12 (0.54–8.27)         | 2.14 (0.47–9.76)         |
|                        | Female | 1.27 (0.77–2.08)         | <i>2.09 (1.05–4.18)</i>  |
| <b>OCDF</b>            | Total  | <i>1.61 (1.01–2.57)</i>  | <i>1.71 (1.00–2.91)</i>  |
|                        | Male   | 1.50 (0.84–2.67)         | 1.7 (0.76–3.78)          |
|                        | Female | 2.29 (0.95–5.51)         | 2.6 (0.82–8.23)          |
| <b>Non-ortho PCBs</b>  |        |                          |                          |
| <b>4CB-77</b>          | Total  | 0.86 (0.52–1.43)         | 1.09 (0.63–1.88)         |
|                        | Male   | 1.41 (0.63–3.16)         | 1.88 (0.70–5.04)         |
|                        | Female | 0.61 (0.26–1.45)         | 0.67 (0.26–1.73)         |
| <b>4CB-81</b>          | Total  | <i>1.82 (1.07–3.08)</i>  | <i>1.81 (1.02–3.24)</i>  |
|                        | Male   | 1.06 (0.59–1.92)         | 0.75 (0.36–1.57)         |
|                        | Female | -                        | -                        |
| <b>5CB-126</b>         | Total  | -                        | -                        |
|                        | Male   | -                        | -                        |
|                        | Female | -                        | -                        |
| <b>6CB-169</b>         | Total  | 1.32 (0.83–2.10)         | 1.43 (0.85–2.41)         |
|                        | Male   | 1.53 (0.82–2.84)         | 1.66 (0.79–3.49)         |
|                        | Female | 1.13 (0.53–2.40)         | 1.21 (0.52–2.81)         |
| <b>Mono-ortho PCBs</b> |        |                          |                          |

|                |        |                         |                  |
|----------------|--------|-------------------------|------------------|
| <b>5CB-105</b> | Total  | 0.96 (0.61–1.52)        | 1.00 (0.60–1.66) |
|                | Male   | 1.27 (0.70–2.33)        | 1.38 (0.68–2.80) |
|                | Female | 0.61 (0.28–1.36)        | 0.64 (0.26–1.58) |
| <b>5CB-114</b> | Total  | 0.63 (0.36–1.09)        | 0.70 (0.39–1.27) |
|                | Male   | 1.00 (0.49–2.04)        | 0.98 (0.44–2.19) |
|                | Female | <i>0.34 (0.12–0.98)</i> | 0.40 (0.13–1.23) |
| <b>5CB-118</b> | Total  | 1.01 (0.64–1.59)        | 1.05 (0.63–1.75) |
|                | Male   | 1.42 (0.77–2.61)        | 1.50 (0.73–3.04) |
|                | Female | 0.60 (0.27–1.33)        | 0.64 (0.25–1.62) |
| <b>5CB-123</b> | Total  | 1.34 (0.85–2.11)        | 1.44 (0.88–2.37) |
|                | Male   | 1.49 (0.80–2.79)        | 1.65 (0.82–3.30) |
|                | Female | 1.20 (0.61–2.39)        | 1.43 (0.64–3.19) |
| <b>6CB-156</b> | Total  | 0.79 (0.48–1.28)        | 0.85 (0.50–1.46) |
|                | Male   | 1.22 (0.66–2.26)        | 1.24 (0.61–2.50) |
|                | Female | 0.34 (0.12–1.01)        | 0.37 (0.11–1.22) |
| <b>6CB-157</b> | Total  | 0.89 (0.56–1.42)        | 1.00 (0.59–1.69) |
|                | Male   | 1.64 (0.85–3.15)        | 1.72 (0.79–3.72) |
|                | Female | 0.35 (0.13–0.95)        | 0.39 (0.13–1.19) |
| <b>6CB-167</b> | Total  | 1.04 (0.66–1.65)        | 1.15 (0.68–1.93) |
|                | Male   | 1.66 (0.88–3.13)        | 1.85 (0.88–3.89) |
|                | Female | 0.49 (0.19–1.24)        | 0.50 (0.17–1.48) |
| <b>7CB-189</b> | Total  | 0.90 (0.56–1.44)        | 0.94 (0.55–1.61) |
|                | Male   | 1.62 (0.85–3.07)        | 1.73 (0.78–3.85) |
|                | Female | 0.30 (0.09–1.00)        | 0.28 (0.07–1.13) |

OR, Odds ratio; CI, confidence interval.

Model 1: Adjusted for age and sex

Model 2: Adjusted for the model 1 variables, body mass index, systolic blood pressure and high-density lipoprotein

Marked in italics based on statistically significant results.

**Supplementary Table S3. Odds Ratios of blood concentrations for homologue of PCDD/DFs, DL-PCBs (per 1 SD) and Thyroid Cancer.**

| Exposure            | Dataset | Model 1           | Model 2           | Model 3           |
|---------------------|---------|-------------------|-------------------|-------------------|
|                     |         | OR (95% CI)       |                   |                   |
| PCDDs               |         |                   |                   |                   |
| 2,3,7,8-TCDD        | Total   | 1.47 (0.86–2.49)  | 1.49 (0.87–2.56)  | 1.50 (0.87–2.58)  |
|                     | Male    | 1.40 (0.64–3.07)  | 1.40 (0.64–3.06)  | 1.49 (0.65–3.38)  |
|                     | Female  | 1.51 (0.73–3.13)  | 1.59 (0.75–3.39)  | 1.94 (0.80–4.72)  |
| 1,2,3,7,8-PeCDD     | Total   | 5.31 (1.72–16.32) | 5.61 (1.80–17.46) | 5.55 (1.77–17.39) |
|                     | Male    | 3.23 (1.10–9.48)  | 3.23 (1.11–9.35)  | 3.36 (1.12–10.09) |
|                     | Female  | -                 | -                 | -                 |
| 1,2,3,4,7,8-HxCDD   | Total   | 1.44 (0.87–2.38)  | 1.49 (0.88–2.51)  | 1.49 (0.88–2.53)  |
|                     | Male    | 1.41 (0.68–2.92)  | 1.48 (0.69–3.16)  | 1.46 (0.68–3.14)  |
|                     | Female  | 1.46 (0.73–2.92)  | 1.49 (0.72–3.08)  | 1.48 (0.69–3.19)  |
| 1,2,3,6,7,8-HxCDD   | Total   | 1.17 (0.66–2.06)  | 1.17 (0.66–2.07)  | 1.17 (0.66–2.09)  |
|                     | Male    | 1.38 (0.59–3.21)  | 1.36 (0.59–3.17)  | 1.46 (0.61–3.51)  |
|                     | Female  | 0.98 (0.43–2.26)  | 0.79 (0.31–2.03)  | 0.79 (0.31–2.07)  |
| 1,2,3,7,8,9-HxCDD   | Total   | 1.33 (0.80–2.20)  | 1.36 (0.81–2.28)  | 1.41 (0.83–2.40)  |
|                     | Male    | 1.00 (0.48–2.07)  | 0.99 (0.48–2.06)  | 0.97 (0.46–2.04)  |
|                     | Female  | 2.49 (0.86–7.21)  | 2.45 (0.80–7.53)  | 3.10 (1.01–9.44)  |
| 1,2,3,4,6,7,8-HpCDD | Total   | 2.60 (1.29–5.21)  | 2.77 (1.34–5.72)  | 2.80 (1.35–5.79)  |
|                     | Male    | 1.72 (0.74–3.98)  | 1.69 (0.73–3.92)  | 1.72 (0.72–4.07)  |
|                     | Female  | 6.34 (1.60–25.19) | 6.36 (1.56–25.98) | 6.51 (1.56–27.18) |
| OCDD                | Total   | 1.21 (0.71–2.08)  | 1.24 (0.72–2.14)  | 1.24 (0.72–2.15)  |
|                     | Male    | 0.82 (0.29–2.27)  | 0.82 (0.30–2.27)  | 0.85 (0.31–2.32)  |
|                     | Female  | 2.01 (0.78–5.17)  | 1.86 (0.73–4.79)  | 1.86 (0.71–4.89)  |

| PCDFs                      |        |                  |                   |                   |
|----------------------------|--------|------------------|-------------------|-------------------|
| <b>2,3,7,8-TCDF</b>        | Total  | 2.01 (1.16–3.47) | 2.16 (1.21–3.87)  | 2.17 (1.21–3.87)  |
|                            | Male   | 1.57 (0.75–3.30) | 1.55 (0.72–3.32)  | 1.57 (0.72–3.44)  |
|                            | Female | 2.96 (1.13–7.75) | 4.22 (1.24–14.43) | 4.75 (1.39–16.21) |
| <b>1,2,3,7,8-PeCDF</b>     | Total  | 1.24 (0.73–2.12) | 1.23 (0.72–2.11)  | 1.23 (0.72–2.11)  |
|                            | Male   | 2.22 (0.96–5.11) | 2.19 (0.94–5.11)  | 2.48 (1.01–6.11)  |
|                            | Female | 0.73 (0.29–1.83) | 0.70 (0.26–1.83)  | 0.69 (0.25–1.88)  |
| <b>2,3,4,7,8-PeCDF</b>     | Total  | 1.22 (0.68–2.17) | 1.25 (0.69–2.24)  | 1.24 (0.69–2.24)  |
|                            | Male   | 2.20 (0.76–6.38) | 2.24 (0.73–6.81)  | 2.26 (0.73–7.01)  |
|                            | Female | 0.86 (0.39–1.87) | 0.92 (0.42–2.02)  | 0.88 (0.39–1.98)  |
| <b>1,2,3,4,7,8-HxCDF</b>   | Total  | -                | -                 | -                 |
|                            | Male   | -                | -                 | -                 |
|                            | Female | -                | -                 | -                 |
| <b>1,2,3,6,7,8-HxCDF</b>   | Total  | 1.55 (0.92–2.61) | 1.64 (0.96–2.80)  | 1.74 (0.99–3.07)  |
|                            | Male   | -                | -                 | -                 |
|                            | Female | 0.67 (0.18–2.47) | 0.68 (0.17–2.77)  | 0.72 (0.17–3.04)  |
| <b>2,3,4,6,7,8-HxCDF</b>   | Total  | -                | -                 | -                 |
|                            | Male   | -                | -                 | -                 |
|                            | Female | -                | -                 | -                 |
| <b>1,2,3,7,8,9-HxCDF</b>   | Total  | 1.08 (0.62–1.87) | 1.12 (0.64–1.94)  | 1.12 (0.64–1.95)  |
|                            | Male   | 1.21 (0.54–2.71) | 1.22 (0.55–2.74)  | 1.24 (0.55–2.80)  |
|                            | Female | 0.97 (0.46–2.06) | 0.97 (0.45–2.08)  | 0.98 (0.45–2.10)  |
| <b>1,2,3,4,6,7,8-HpCDF</b> | Total  | 1.34 (0.73–2.46) | 1.49 (0.79–2.81)  | 1.52 (0.80–2.89)  |
|                            | Male   | 1.13 (0.45–2.82) | 1.11 (0.45–2.74)  | 1.10 (0.45–2.67)  |
|                            | Female | 1.78 (0.63–4.99) | 2.00 (0.67–5.98)  | 2.09 (0.69–6.33)  |
| <b>1,2,3,4,7,8,9-HpCDF</b> | Total  | 0.93 (0.50–1.75) | 0.93 (0.49–1.76)  | 0.93 (0.49–1.77)  |

|                        |        |                  |                  |                  |
|------------------------|--------|------------------|------------------|------------------|
| <b>OCDF</b>            | Male   | -                | -                | -                |
|                        | Female | 0.96 (0.52–1.80) | 0.91 (0.48–1.75) | 0.93 (0.48–1.80) |
|                        | Total  | 1.02 (0.57–1.81) | 1.04 (0.58–1.87) | 1.04 (0.58–1.87) |
|                        | Male   | 2.43 (0.92–6.40) | 2.44 (0.92–6.46) | 3.06 (1.02–9.16) |
|                        | Female | 0.48 (0.13–1.72) | 0.41 (0.10–1.63) | 0.39 (0.10–1.61) |
| <b>Non-ortho PCBs</b>  |        |                  |                  |                  |
| <b>4CB-77</b>          | Total  | 1.93 (1.03–3.60) | 1.93 (1.02–3.64) | 1.92 (1.02–3.64) |
|                        | Male   | 1.18 (0.61–2.26) | 1.17 (0.61–2.26) | 1.21 (0.62–2.38) |
|                        | Female | -                | -                | -                |
| <b>4CB-81</b>          | Total  | -                | -                | -                |
|                        | Male   | -                | -                | -                |
|                        | Female | -                | -                | -                |
| <b>5CB-126</b>         | Total  | 1.43 (0.80–2.58) | 1.44 (0.80–2.60) | 1.44 (0.80–2.61) |
|                        | Male   | 1.56 (0.72–3.37) | 1.55 (0.68–3.50) | 1.60 (0.70–3.66) |
|                        | Female | 1.26 (0.47–3.36) | 1.21 (0.43–3.39) | 1.22 (0.42–3.56) |
| <b>6CB-169</b>         | Total  | 1.59 (0.87–2.91) | 1.62 (0.88–2.98) | 1.61 (0.88–2.98) |
|                        | Male   | 2.01 (0.84–4.81) | 2.01 (0.84–4.82) | 2.05 (0.84–4.99) |
|                        | Female | 1.23 (0.51–2.97) | 1.18 (0.48–2.93) | 1.10 (0.43–2.83) |
| <b>Mono-ortho PCBs</b> |        |                  |                  |                  |
| <b>5CB-105</b>         | Total  | 1.27 (0.74–2.20) | 1.25 (0.71–2.18) | 1.24 (0.71–2.18) |
|                        | Male   | 1.65 (0.81–3.36) | 1.68 (0.79–3.57) | 1.67 (0.78–3.57) |
|                        | Female | 0.71 (0.25–2.04) | 0.60 (0.19–1.90) | 0.52 (0.16–1.73) |
| <b>5CB-114</b>         | Total  | 0.76 (0.40–1.47) | 0.75 (0.39–1.46) | 0.75 (0.38–1.46) |
|                        | Male   | 1.03 (0.41–2.57) | 0.97 (0.37–2.56) | 0.99 (0.37–2.62) |
|                        | Female | 0.58 (0.21–1.56) | 0.51 (0.17–1.53) | 0.44 (0.13–1.44) |
| <b>5CB-118</b>         | Total  | 1.36 (0.79–2.34) | 1.33 (0.77–2.31) | 1.33 (0.77–2.31) |

|                |        |                  |                  |                  |
|----------------|--------|------------------|------------------|------------------|
|                | Male   | 1.62 (0.81–3.25) | 1.65 (0.78–3.47) | 1.65 (0.78–3.49) |
|                | Female | 0.91 (0.33–2.50) | 0.82 (0.28–2.40) | 0.69 (0.22–2.18) |
|                | Total  | 1.63 (0.93–2.86) | 1.61 (0.92–2.84) | 1.61 (0.92–2.84) |
| <b>5CB-123</b> | Male   | 2.28 (0.93–5.59) | 2.36 (0.95–5.86) | 2.38 (0.94–6.04) |
|                | Female | 1.08 (0.43–2.68) | 0.97 (0.37–2.55) | 0.89 (0.33–2.44) |
| <b>6CB-156</b> | Total  | 0.91 (0.49–1.69) | 0.89 (0.48–1.67) | 0.89 (0.48–1.66) |
|                | Male   | 1.26 (0.60–2.65) | 1.22 (0.56–2.67) | 1.23 (0.56–2.73) |
|                | Female | 0.54 (0.18–1.61) | 0.48 (0.14–1.57) | 0.39 (0.11–1.43) |
| <b>6CB-157</b> | Total  | 1.17 (0.67–2.05) | 1.17 (0.66–2.05) | 1.16 (0.66–2.04) |
|                | Male   | 1.59 (0.77–3.26) | 1.58 (0.75–3.35) | 1.60 (0.75–3.42) |
|                | Female | 0.71 (0.27–1.84) | 0.66 (0.24–1.82) | 0.55 (0.18–1.67) |
| <b>6CB-167</b> | Total  | 1.55 (0.89–2.71) | 1.55 (0.88–2.70) | 1.54 (0.88–2.70) |
|                | Male   | 1.75 (0.85–3.63) | 1.79 (0.84–3.83) | 1.79 (0.83–3.88) |
|                | Female | 1.18 (0.41–3.39) | 1.12 (0.37–3.38) | 0.99 (0.31–3.17) |
| <b>7CB-189</b> | Total  | 0.95 (0.52–1.73) | 0.92 (0.50–1.71) | 0.92 (0.50–1.70) |
|                | Male   | 1.53 (0.72–3.25) | 1.51 (0.69–3.31) | 1.51 (0.68–3.36) |
|                | Female | 0.45 (0.14–1.45) | 0.38 (0.10–1.40) | 0.32 (0.08–1.31) |

OR, Odds ratio; CI, confidence interval.

Model 1: Adjusted for age and sex

Model 2: Adjusted for the model 1 variables and body mass index

Model 3: Adjusted for the model 2 variables and thyroid stimulating hormone

Marked in italics based on statistically significant results.

**Supplementary Figure S1. Flow Chart: Sample for the Analysis, KCPS-II.**

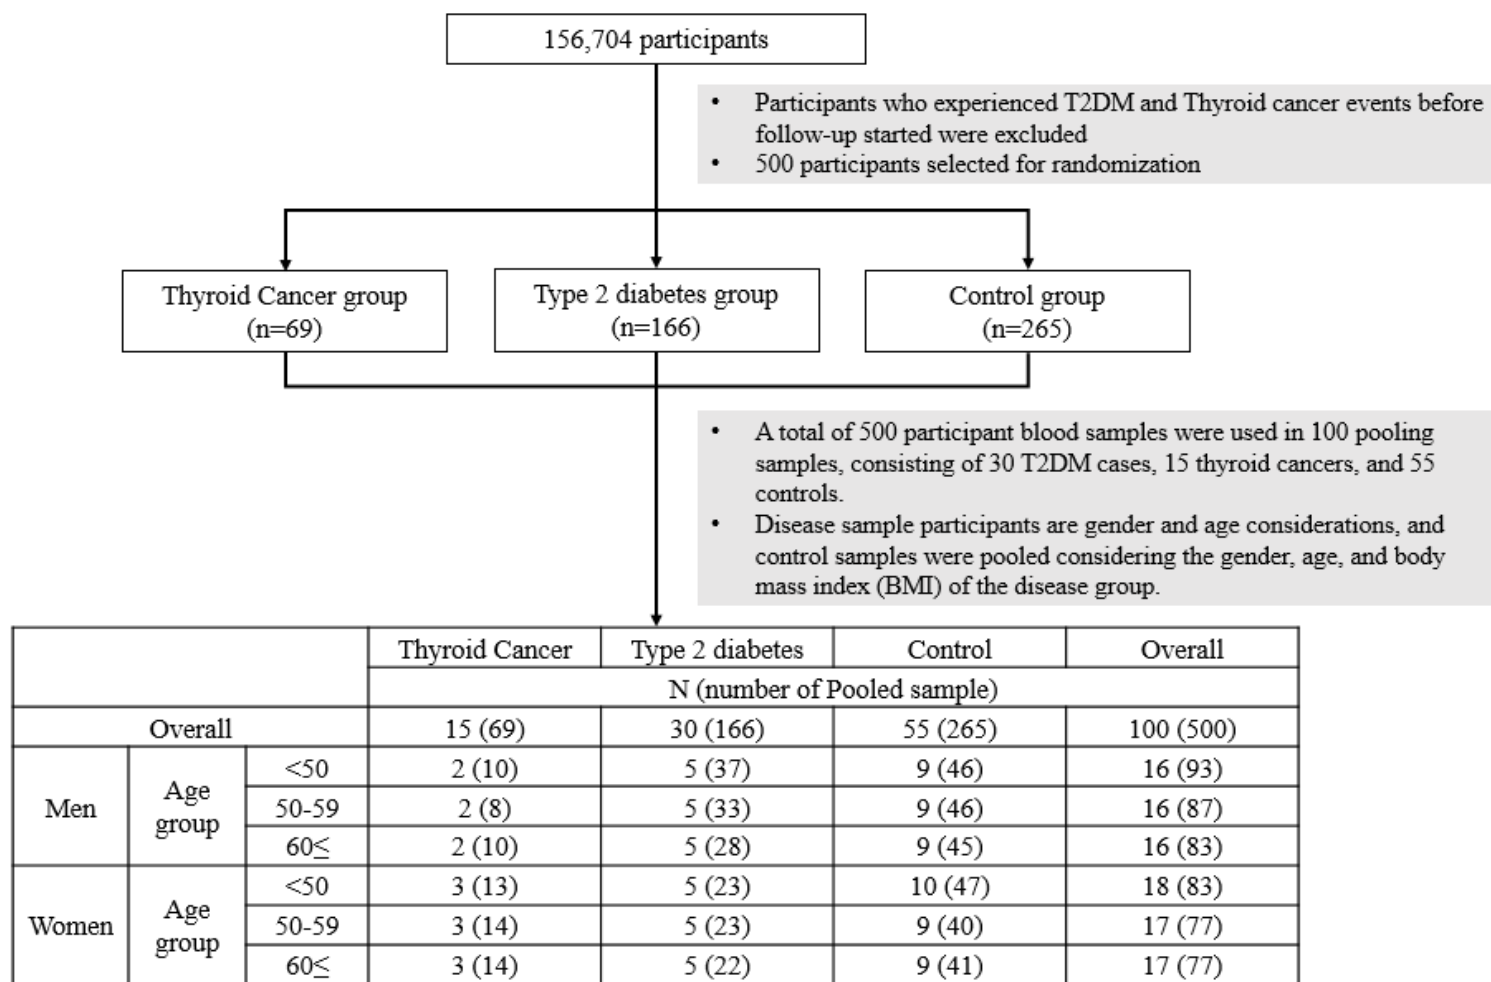

**Supplementary Figure S2. Schematic diagram showing different groups of blood samples tested for blood concentrations of PCDD/DFs, DL-PCBs (pgTEQ/g\_lipid).**

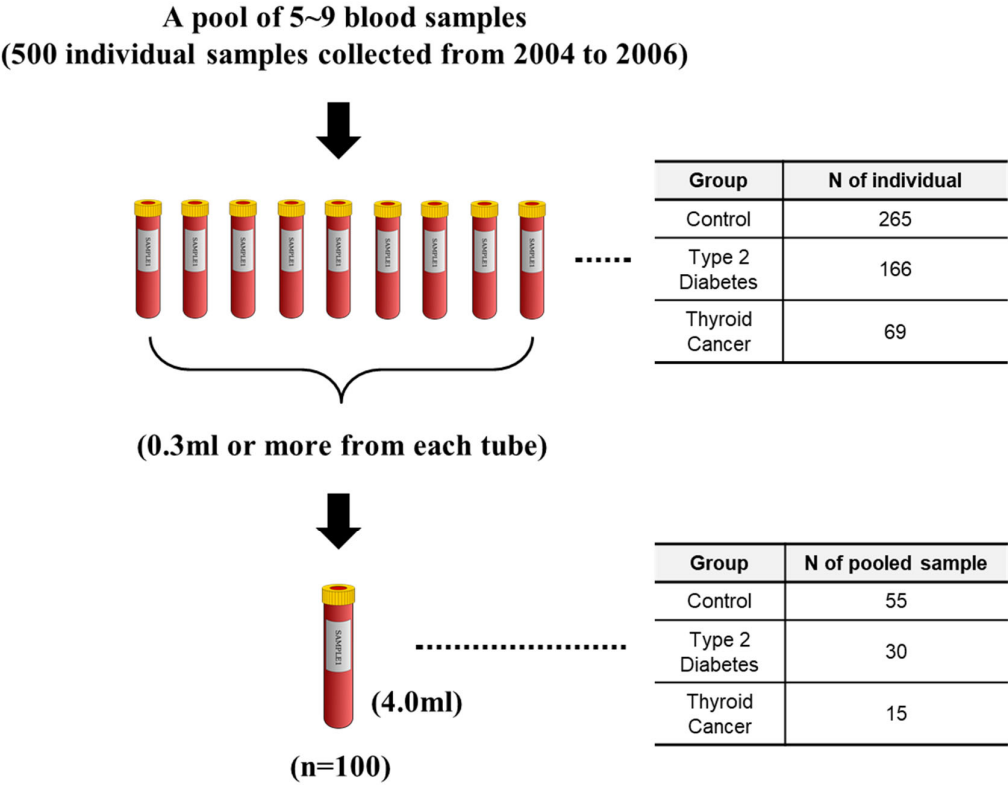

Supplement: Supplementary file 1 [file ijerph-19-08745-s001.zip › ijerph-1770965-supplementary.pdf]
